# Supplementary material for: Long Noncoding RNA Kcna2 Antisense RNA Contributes to Ventricular Arrhythmias via Silencing Kcna2 in Rats With Congestive Heart Failure
Source: PubMed Central journal article supplement — J Am Heart Assoc. 2017 Dec 20;6(12):e005965. doi: 10.1161/JAHA.117.005965 (PMC5778995; doi:10.1161/jaha.117.005965), 2017-12-20
Supplement: JAH3-6-e005965-s001.pdf [file JAH3-6-e005965-s001.pdf]

# **SUPPLEMENTAL MATERIAL**

**Table S1. Sequences of primers**

| <b>Gene</b>           | <b>Species</b> | <b>Sequences</b>               |
|-----------------------|----------------|--------------------------------|
| <b><i>RT-PCR</i></b>  |                |                                |
| GAPDH-RT              | Rat            | 5'-GAGGGTGCAGCGAACTTTATTGAT-3' |
| Kcna2 AS-RT           | Rat            | 5'-CGTCACACCTCCTGAGGACAG-3'    |
| GAPDH-F               | Rat            | 5'-ACCACAGTCCATGCCATCAC-3'     |
| GAPDH-R               | Rat            | 5'-TCCACCACCCTGTTGCTGTA-3'     |
| Kcna2 AS-F            | Rat            | 5'-CTGCCCCCAGACTGGTAGTA-3'     |
| Kcna2 AS-R            | Rat            | 5'-CCCAGTGGATGAGGCTGCTG-3'     |
| <b><i>qRT-PCR</i></b> |                |                                |
| GAPDH-RT              | Rat            | 5'-TCCTGTTGTTATGGGGTCTG-3'     |
| Kcna2-RT              | Rat            | 5'-GGGTGACTCTCATCTTTGGA-3'     |
| Kcna2 AS-RT           | Rat            | 5'-CTGGCAGCATCATAATAATAG-3'    |
| GAPDH-F               | Rat            | 5'-TCGGTGTGAACGGATTTGGC-3'     |
| GAPDH-R               | Rat            | 5'-CCTTCAGGTGAGCCCCAGC-3'      |
| Kcna2-F               | Rat            | 5'-CCCATCTGCAAGGGCAACGT-3'     |
| Kcna2-R               | Rat            | 5'-CACAGCCTCCTTTGGCTGGC-3'     |
| Kcna2 AS-F            | Rat            | 5'-CTGAGGACAGCCAGGAGGA-3'      |
| Kcna2 AS-R            | Rat            | 5'-GCTTGAGGGACAGTGAGATG-3'     |
| ANP-F                 | Rat            | 5'-CTCCCAGGCCATATTGGAG-3'      |
| ANP-R                 | Rat            | 5'-TCCAGGTGGTCTAGCAGGTT-3'     |
| BNP-F                 | Rat            | 5'-TGGGAAGTCCTAGCCAGTCTC-3'    |
| BNP-R                 | Rat            | 5'-TCTGAGCCATTTCTCTGAC-3'      |
| GAPDH-RT              | Human          | 5'-TGGTAGTTCGATGTAGCTAG-3'     |
| Kcna2-RT              | Human          | 5'-CTTGAGGTCGGGTATCGTAT-3'     |
| Kcna2 AS-RT           | Human          | 5'-ACTCACCATTATTTCTAGCTCG-3'   |
| GAPDH-F               | Human          | 5'-GGAGCGAGATCCCTCCAAAAT-3'    |
| GAPDH-R               | Human          | 5'-GGCTGTTGTCATACTTCTCATGG-3'  |
| Kcna2-F               | Human          | 5'-AGACCACGAGTGCTGTGAGA-3'     |
| Kcna2-R               | Human          | 5'-AGTACCTCATTCGTTTCTTTGGG-3'  |
| Kcna2 AS-F            | Human          | 5'-TCTAAGGGCACATTCACAGGTC-3'   |
| Kcna2 AS-R            | Human          | 5'-TGTTGGTGCATCTCAGATTCCT-3'   |

RT: reverse transcription, F: forward, R: reverse.

**Figure S1. Transfection efficiency using fluorescence in vivo and in vitro.**

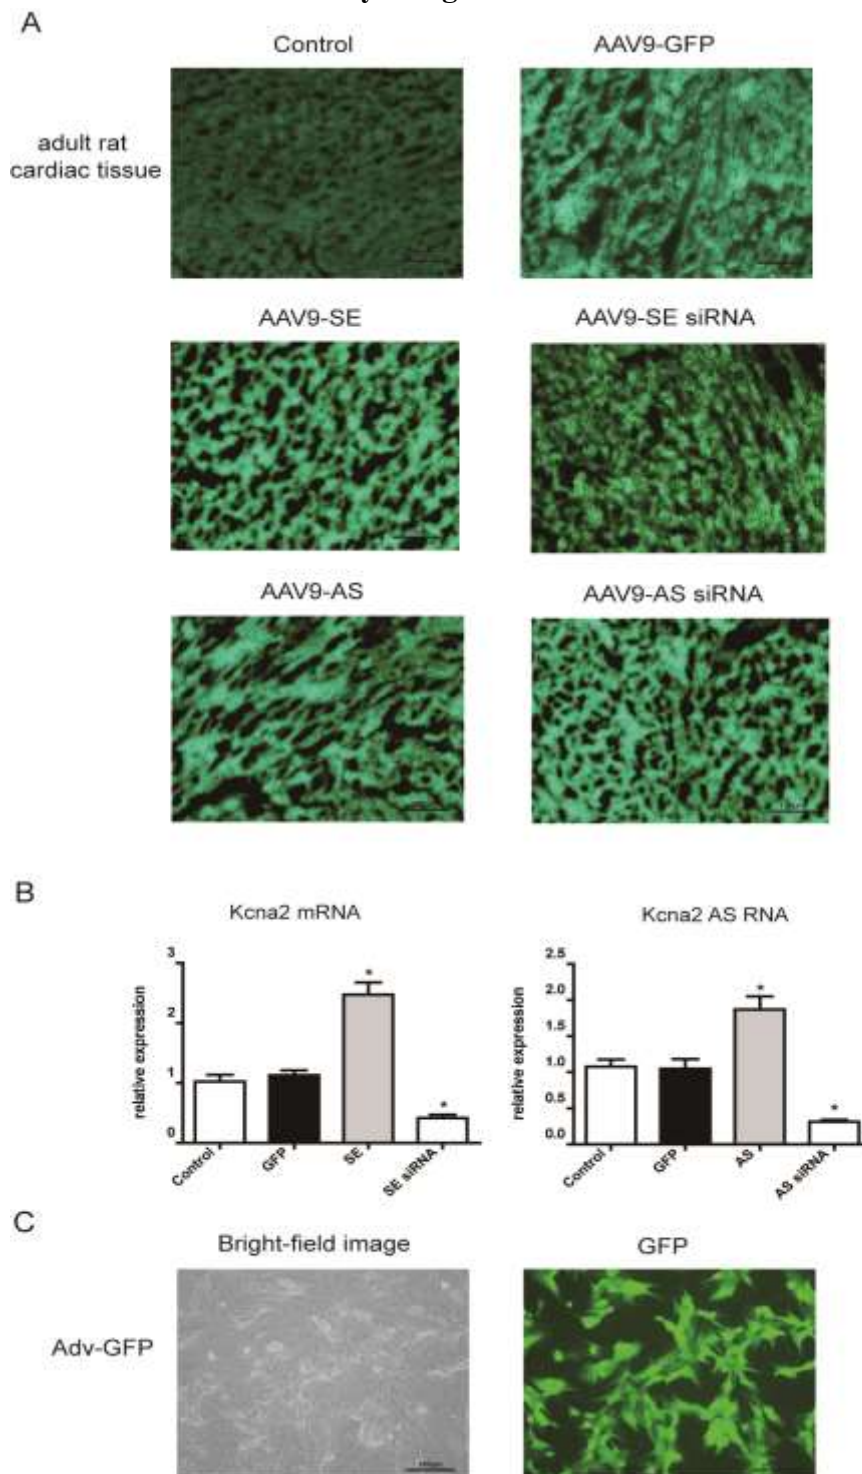

A: Control cardiac tissue and AAV9-GFP, AAV9-SE, AAV9-SE siRNA, AAV9-AS, AAV9-AS siRNA infected cardiac tissue (right;  $\times 200$  magnification). B: qRT-PCR results for Kcna2 mRNA and Kcna2 AS expression levels in heart samples from adult rats treated with various constructs ( $n=4$ ).  $*P<0.05$  versus Control. C: Fluorescence images of primary cultured neonatal cardiomyocytes transfected with Adv-GFP. Bright-field image (left); fluorescent image (right;  $\times 200$  magnification).

**Figure S2. Identification and expression of Kcna2 AS and Kcna2 mRNA in rat hearts.**

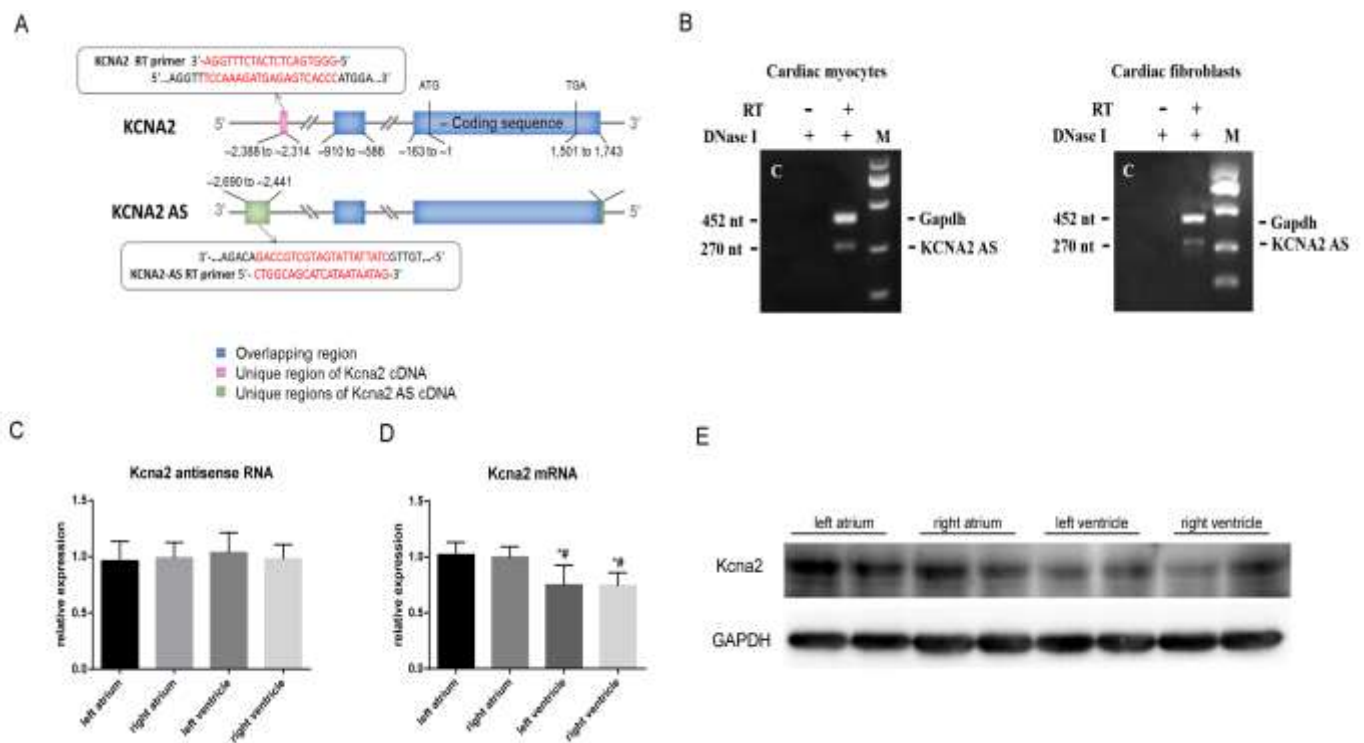

A: Specific RT primers targeting the unique sequences of Kcna2 or KCNA2 AS RNA were used to perform reverse transcription. We obtained transcript specific cDNA for downstream RT-PCR or qRT-PCR. B: Kcna2 AS transcripts were detected in cardiac myocytes and fibroblasts of rat using reverse transcription (RT)-PCR with strand-specific primers. Gapdh is a control. C, no-template control. n=3 repeated experiments per species. C: The qRT-PCR results show native Kcna2 AS expression in the left atrium, right atrium, left ventricle, and right ventricle. GAPDH was used as a Control. The data are from three separate experiments. (n=6) D: qRT-PCR and E: Western blot showing the Kcna2 levels. (n=6). \* P<0.05, # P<0.05 versus the respective Controls.

**Figure S3. The evaluation of cardiac dysfunction in the respective in vivo and in vitro models.**

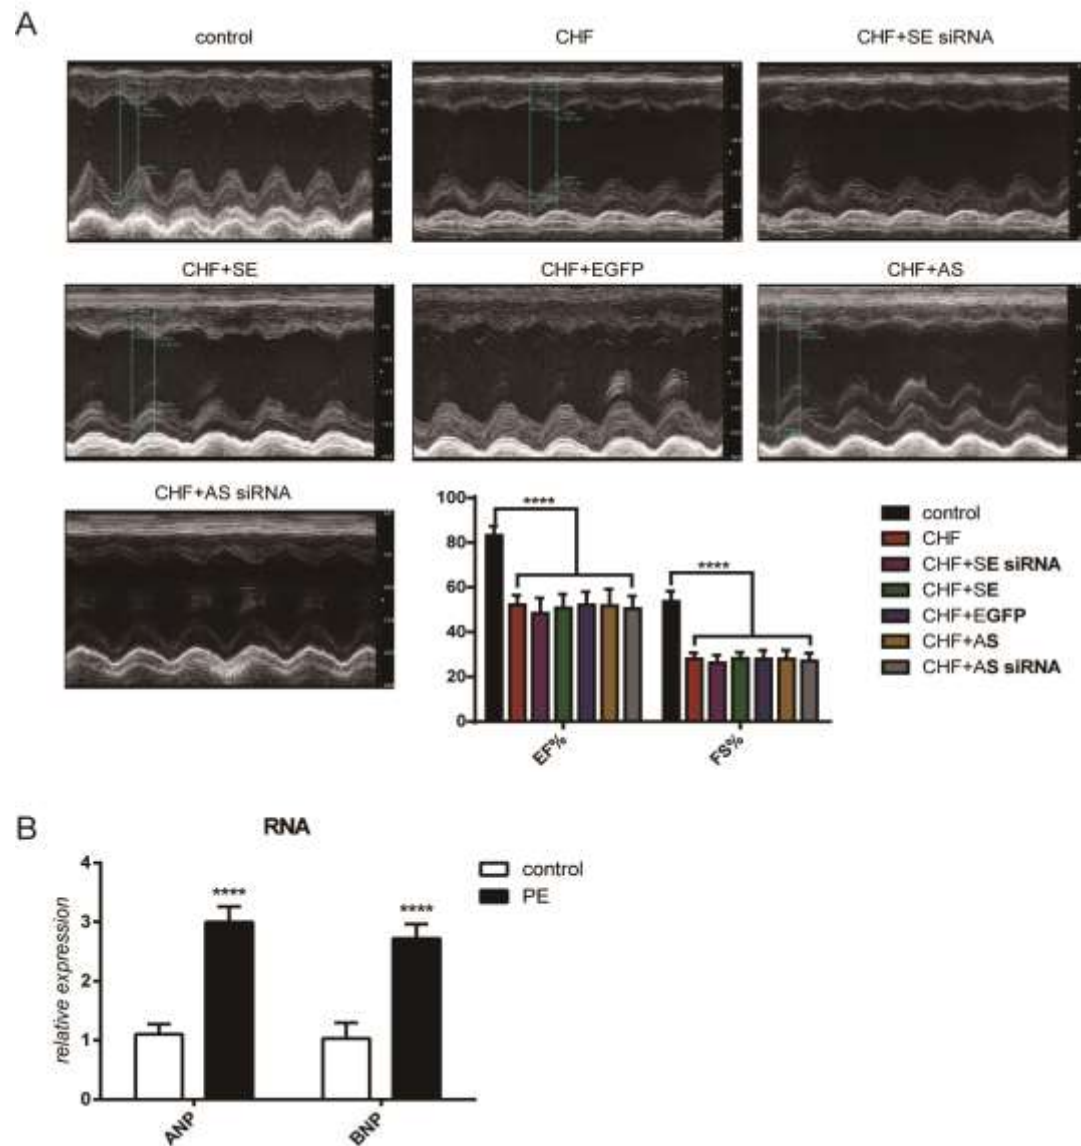

A, Fractional shortening (%) and ejection fraction (%) measured by echocardiography 8 weeks after the TAC procedure (n=6). control: sham surgery; CHF: rats with congestive heart failure; CHF+SE siRNA: knockdown of Kcna2 in rat hearts with CHF; CHF+SE: overexpression of Kcna2 in rat hearts with CHF; CHF+EGFP: green fluorescent protein (GFP) expressing control in rat hearts with CHF; CHF+AS: overexpression of Kcna2 AS in rat hearts with CHF; CHF+AS siRNA: knockdown of Kcna2 AS in rat hearts with CHF. \*\*\*\*P<0.0001. B, The mRNA levels of ANP, BNP, and MYH7 were assayed using real-time PCR in primary neonatal rat cardiomyocytes (n=6). \*\*\*\*P<0.0001.

**Figure S4. Expression of Kcna2 AS and Kcna2 in human normal and heart failure tissue.**

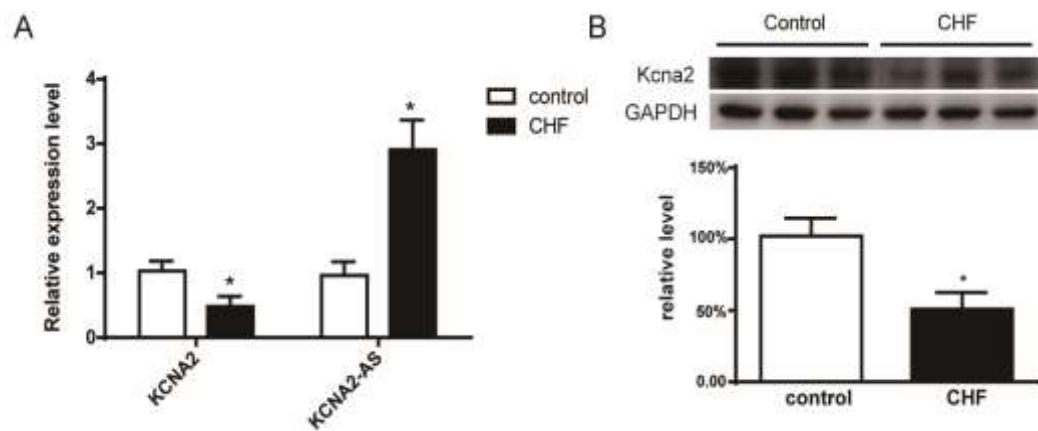

A: Kcna2 AS levels were increased and Kcna2 mRNA levels were reduced in the hearts of patients with CHF (n=3). \* $P < 0.05$  versus Control. Control: normal human; CHF: patients with congestive heart failure. B: Kcna2 protein levels were decreased in the hearts of patients with CHF (n=3). \* $P < 0.05$  versus Control.

Figure S5. Kv1.2 channel encoding the  $I_{ks}$  current.

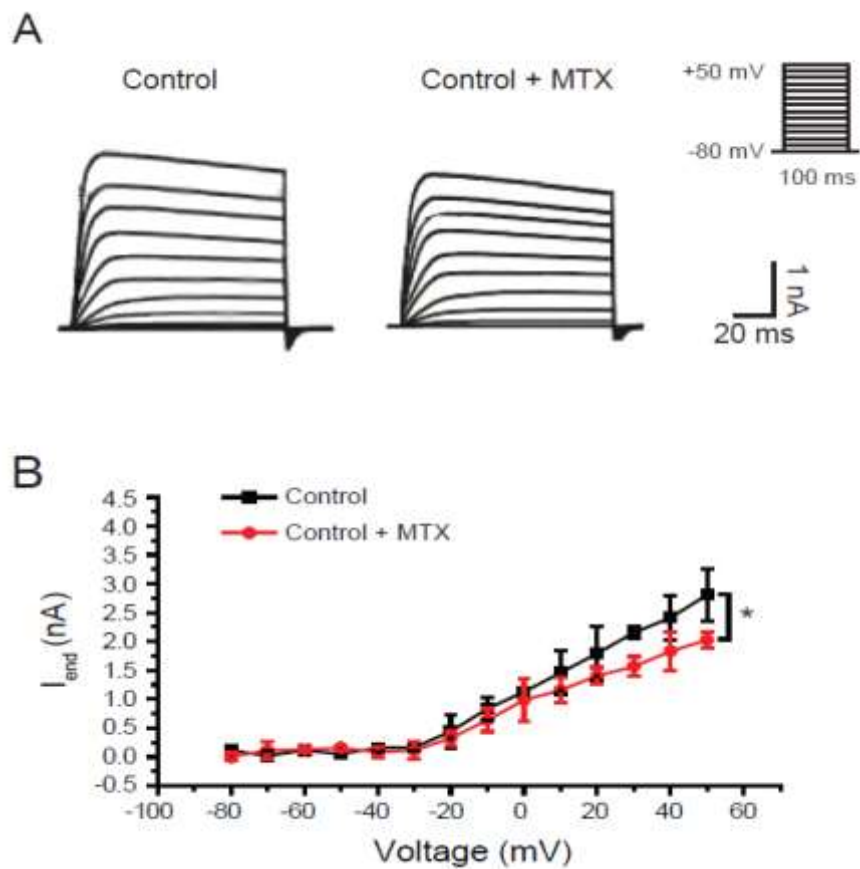

A, Representative traces of the  $I_{ks}$  current in cardiomyocytes before or after treatment with 100 nM MTX. MTX: maurotoxin, a selective  $K_{cna2}$  current inhibitor. B, I-V curve for cardiomyocytes ( $n=9$  cells, 3 rats) before or after treatment with 100 nM MTX. The current density was plotted against each voltage. \* $P < 0.05$  versus the control group.
